# Supplementary material for: Identification of PIMREG as a novel prognostic signature in breast cancer via integrated bioinformatics analysis and experimental validation
Source: PeerJ journal article supplement (doi:10.7717/peerj.15703), 2023-07-17
Supplement: RDBCTissueWesternBlot.pdf [file RDBCTissueWesternBlot.pdf]

P1

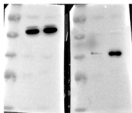

P2

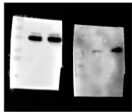

P3

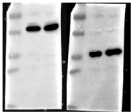

P4

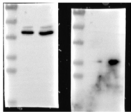

P5

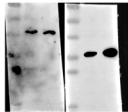

actin PIMREG actin PIMREG actin PIMREG actin PIMREG actin PIMREG
