# Supplementary material for: Identification of PIMREG as a novel prognostic signature in breast cancer via integrated bioinformatics analysis and experimental validation
Source: PeerJ journal article supplement (doi:10.7717/peerj.15703), 2023-07-17
Supplement: RDCellLinesTranswell.pdf [file RDCellLinesTranswell.pdf]

Repeat1



Con

siPIMREG

Repeat2



Repeat3
