# Supplementary material for: Identification of PIMREG as a novel prognostic signature in breast cancer via integrated bioinformatics analysis and experimental validation
Source: PeerJ journal article supplement (doi:10.7717/peerj.15703), 2023-07-17
Supplement: RDCellWesternBlot.pdf [file RDCellWesternBlot.pdf]

Repeat1

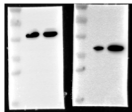

actin PIMREG

Repeat2

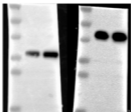

PIMREG actin

Repeat3

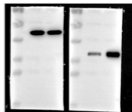

actin PIMREG
