# Supplementary material for: Identification of PIMREG as a novel prognostic signature in breast cancer via integrated bioinformatics analysis and experimental validation
Source: PeerJ. 2023 Jul 17;11:e15703. doi: 10.7717/peerj.15703 (PMC10358341; doi:10.7717/peerj.15703)
Supplement: Supplemental Information 5 [file peerj-11-15703-s005.xls]

## Sheet: PIMREG drug response
Drug name	Y-score	Y-(p-value)	X-score	X-(p-value)			X-score
Mitoxantrone	1.001	0.001	0.613	0.021	Postive		log(fold-change) of PIMREG expression between samples of high and low response of target drug.
Bleomycin	0.982	0	1	0	Postive		Y-score
AZD7762	0.906	0.003	0.978	0	Postive		log(fold-change) of target drug response between samples of high and low PIMREG expression.
VE821	0.88	0	0.869	0.001	Postive
Tozasertib	0.876	0	0.94	0	Postive
Alisertib	0.863	0	0.986	0	Postive
Fludarabine	0.853	0.009	0.546	0.042	Postive
PD0325901	0.833	0.002	0.611	0.025	Postive
Pevonedistat	0.831	0.001	1.055	0	Postive
Trametinib	0.824	0.003	0.895	0.001	Postive
Trametinib	0.818	0.018	0.789	0.004	Postive
VE-822	0.81	0.004	0.742	0.004	Postive
Paclitaxel	0.762	0.002	0.553	0.049	Postive
AZD6738	0.754	0.002	0.733	0.007	Postive
AZD7762	0.706	0.001	0.889	0.001	Postive
MK-1775	0.683	0.001	0.934	0	Postive
Dactinomycin	0.644	0.018	0.655	0.017	Postive
Refametinib	0.644	0.001	0.56	0.047	Postive
ICL1100013	0.631	0.003	0.662	0.017	Postive
Crizotinib	0.624	0.006	0.749	0.006	Postive
Foretinib	0.612	0.008	0.698	0.009	Postive
ZM447439	0.588	0.002	0.928	0	Postive
Refametinib	0.582	0.003	0.667	0.02	Postive
Talazoparib	0.58	0.006	0.923	0.001	Postive
Foretinib	0.572	0.002	0.79	0.001	Postive
MK-8776	0.571	0.044	0.785	0.002	Postive
MIM1	0.555	0	0.975	0	Postive
BX795	0.542	0.001	0.709	0.01	Postive
BMS-536924	0.514	0.023	0.752	0.005	Postive
Entospletinib	0.502	0.003	0.722	0.005	Postive
Wee1 Inhibitor	0.488	0.002	1.128	0	Postive
BPD-00008900	0.485	0.003	0.73	0.007	Postive
Selumetinib	0.472	0.018	0.862	0.002	Postive
CHIR-99021	0.433	0	1.06	0	Postive
Pyridostatin	0.433	0.007	0.64	0.017	Postive
WIKI4	0.422	0.009	0.886	0	Postive
Cytarabine	0.418	0.029	0.651	0.02	Postive
Ponatinib	0.38	0.008	0.73	0.005	Postive
EPZ004777	0.371	0.011	0.601	0.027	Postive
Serdemetan	0.368	0.002	1.002	0	Postive
Axitinib	0.363	0.004	0.594	0.035	Postive
Rucaparib	0.358	0.006	0.981	0	Postive
(5Z)-7-Oxozeaenol	0.357	0.008	0.646	0.025	Postive
XAV939	0.32	0.005	0.584	0.038	Postive
Tivozanib	0.159	0.04	0.596	0.025	Postive
ETP-45835	0.155	0.01	0.733	0.005	Postive
I-BET-762	-0.346	0.039	-0.57	0.029	Negative
Acetalax	-0.972	0.01	-0.555	0.039	Negative
