# Supplementary material for: Identification of PIMREG as a novel prognostic signature in breast cancer via integrated bioinformatics analysis and experimental validation
Source: PeerJ. 2023 Jul 17;11:e15703. doi: 10.7717/peerj.15703 (PMC10358341; doi:10.7717/peerj.15703)
Supplement: Supplemental Information 6 [file peerj-11-15703-s006.xlsx]

## Sheet: Sheet1
No	Gender	Age	Grade	Size	Pathological diagnosis	Menopause	Lymph node metastasis
202297148	Female	55	II	1.5×1.5×1 cm	There is a definite mass with a size of 1.5×1.5×1 cm; histopathological diagnosis: (10 points) infiltrating carcinoma, type to be determined by immunohistochemistry; (8 points) ductal carcinoma in situ, presence or absence of infiltration to be determined by immunohistochemistry. Histological differentiation: grade II; lymph node metastasis: total number (5/22) (number of metastases/total number …	YES	YES
202296192	Female	37	III	2.5×1.5×2cm	There is a definite mass, measuring 2.5×1.5×2cm in size. The histological diagnosis is invasive ductal carcinoma. The histological grade is grade III. The lymph node involvement is as follows: Total number: (3/19) (number of metastases/total number of lymph nodes) There are metastases in 3 out of 19 axillary lymph nodes. There is nerve invasion. There is no involvement of the skin. There is no ca…	NO	YES
202296684	Female	49	III	4.8×2.8×5.3 cm	There is a definite mass with a size of 4.8×2.8×5.3 cm. Histological diagnosis: infiltrating ductal carcinoma with necrosis. Histological differentiation: Grade III. Lymph node metastasis: total number (1/17) with metastasis. Axillary lymph nodes: (0/13). Sent for examination: sentinel lymph nodes (1/4) with macrometastasis. Inner upper quadrant: /. Nerve invasion: /. Nipple: not seen. Inner lowe…	YES	YES
202235528	Female	38	I	5×3.5×3.5cm	There is a definite mass with a size of 5×3.5×3.5cm; histological diagnosis: mucinous carcinoma; histological differentiation: grade I; lymph node metastasis: total number: (0/3) (number of metastasis/total number of lymph nodes) (right sentinel lymph node) 0/3 with no metastasis seen; nerve invasion: (-); nipple: (-); skin: (-); base: (-); lower inner quadrant: no special findings; upper outer q…	NO	NO
202246003	Female	67	II	2.5×2.5×2.5 cm	There is a definite mass, with a size of 2.5×2.5×2.5 cm. Histological diagnosis: infiltrating ductal carcinoma, non-special type. Histological grade: grade II. Lymph node metastasis: total number: (0/23) (number of metastases/total number of lymph nodes) axillary lymph nodes: (0/23). Internal upper quadrant: no special findings. Nerve invasion: present. Nipple: no cancer found. Skin: no cancer fo…	YES	NO
